# Supplementary material
Source: PubMed Central journal article supplement (PMC5477546)
Supplement: MCB.00013-17_zmb999101476s4.pdf [file MCB.00013-17_zmb999101476s4.pdf]

**Supplemental Table 1**

| <b>Primer</b>                                                    | <b>Use</b>                             | <b>Sequence</b>                                      | <b>Binding Location</b> |
|------------------------------------------------------------------|----------------------------------------|------------------------------------------------------|-------------------------|
| <b>cDNA Quality Control Primers</b>                              |                                        |                                                      |                         |
| B-actin forward                                                  | PCR (control to ensure cDNA synthesis) | 5' - CCT AAG GCC AAC CGT GAA AAG - 3'                | Exon 2                  |
| B-actin reverse                                                  | PCR (control to ensure cDNA synthesis) | 5' - TCT TCA TGG TGC TAG GAG CCA - 3'                | Exon 4                  |
| <b>qPCR Primers (for steady state &amp; nascent mature mRNA)</b> |                                        |                                                      |                         |
| B2m qPCR forward                                                 | qPCR (                                 | 5' - TGG CTC ACA CTG AAT TCA CCC CCA - 3'            | Exon 2                  |
| B2m qPCR reverse                                                 | qPCR                                   | 5'- TCT CGA TCC CAG TAG ACG GTC TTG G - 3'           | Exon 2                  |
| E2F1 qPCR forward                                                | qPCR                                   | 5'- CGA TTC TGA CGT GCT GCT C -3'                    | Exon 1                  |
| E2F1 qPCR reverse                                                | qPCR                                   | 5'- CAG CGA GGT ACT GAT GGT CA -3'                   | Exon 2                  |
| Cybb qPCR forward                                                | qPCR                                   | 5' – CAA GAT GCC TGG AAA CTA CCT – 3'                | Exon 9                  |
| Cybb qPCR reverse                                                | qPCR                                   | 5' – CCA CTA ACA TCA CCA CCT CAT AG – 3'             | Exon 10                 |
| Acly qPCR forward                                                | qPCR                                   | 5' - CCA GTG AAC AAC AGA CCT ATG A - 3'              | Exon 9                  |
| Acly qPCR reverse                                                | qPCR                                   | 5' - AAT GCT GCC TCC AAT GAT G - 3'                  | Exon 10                 |
| Accs qPCR forward                                                | qPCR                                   | 5' -CCT CCG TCA GCT CAG ATA CA - 3'                  | Exon 1                  |
| Accs qPCR reverse                                                | qPCR                                   | 5' -TTT ACT AGG TGC AAG CCA GAC A- 3'                | Exon 2                  |
| miR-342 forward                                                  | qPCR                                   | TaqMan microRNA assay hsa-miR-342-3p Assay ID 002260 | N/A                     |
| miR-342 reverse                                                  | qPCR                                   | TaqMan microRNA assay U6 snRNA Assay ID 001973       | N/A                     |
| miR-223 forward                                                  | qPCR                                   | 5' - GTG TCA CGC TCC GTG TAT TT - 3'                 | N/A                     |
| miR-223                                                          | qPCR                                   | 5' - GGG TAT TTG ACA AAC TGA CAC TCT A               | N/A                     |

|                                   |                              |                                              |                   |
|-----------------------------------|------------------------------|----------------------------------------------|-------------------|
| reverse                           |                              | - 3'                                         |                   |
| U6 snRNA forward                  | qPCR                         | 5' GCT TCG GCA GCA CAT ATA CTA - 3'          | N/A               |
| U6 snRNA reverse                  | qPCR                         | 5' GGC CAT GCT AAT CTT CTC TGT - 3'          | N/A               |
| Adgre1 forward                    | aPCR                         | 5' - GTG GTC ATA ATC TCT GCT TCT GT - 3'     | Exon 17           |
| Adgre1 reverse                    | qPCR                         | 5' - AAA CTC CAG ATA AAC CCC GTC - 3'        | Exon 18           |
| Spi1 forward                      | qPCR                         | 5' - ATT CGC CTG TAC CAG TTC CTG C - 3'      | Exon 5            |
| Spi1 reverse                      | qPCR                         | 5' - TGG ACG AGA ACT GGA AGG TAC C - 3'      | Exon 5            |
| E2F1 Before exon 1 reverse        | Strand specific PCR          | 5' - CAC TTT TAC CGC CCA AAT C - 3'          | 5' UTR            |
| E2f1 before exon 1 forward        | Strand specific PCR          | 5' - AAC CAA TGC TCG CCA TCG GA - 3'         | 5' UTR            |
| E2f1 intron 1 far forward         | Strand specific PCR          | 5' GAC CTA CCT CTC TAC CTT GTC ATG TA - 3'   | Intron 1          |
| E2f1 intron 1 far reverse (sense) | Strand specific PCR          | 5' - TAG GTT TCA CTA TGT AGC CCT GG - 3'     | intron 1          |
| <b>ChIP Primers</b>               |                              |                                              |                   |
| E2F1 ChIP forward                 | ChIP (PU.1 binding site)     | 5' - AGA GAT GGG GAA GTG CTT CAC G - 3'      | Intron 1          |
| E2F1 ChIP reverse                 | ChIP (PU.1 binding site)     | 5' CGC ACT CCC TAG CCA TAG GTT C - 3'        | Intron 1          |
| Cybb ChIP forward                 | ChIP (PU.1 binding site)     | 5'- TGC CCC AAA GCT GCT GTT TTC -3'          | 5' UTR (promoter) |
| Cybb ChIP reverse                 | ChIP (PU.1 binding site)     | 5'- GGA GAG TCC TTC ATT CAC AGC C -3'        | Exon 1            |
| E2F1 - non PU.1                   | ChIP (non-PU.1 binding site) | 5' - GTT CCA GGA CAG TCA GGG CTA TAC AG - 3' | Intron 4          |
| E2F1 - non PU.1                   | ChIP (non-PU.1 binding site) | 5' - CCA TCT CTC CAG TCC TTG GCT TC - 3'     | Intron 4          |



| Primers for Plasmid Construction               |                           |                                                       |         |     |
|------------------------------------------------|---------------------------|-------------------------------------------------------|---------|-----|
| Adding NotI site to E2F1 origene plasmid       | Plasmid Construction      | 5'-AGC GGC CGC CGG GAA TTC GTC GAC TGG-3'             | Forward | N/A |
| Adding NotI site to E2F1 origene plasmid       | Plasmid Construction      | 5'-AGC GGC CGC TTT GCT GCC AGA TCC TCT TC-3'          | Reverse | N/A |
| E2F1 intron 1 cloning from Genomic DNA         | Plasmid Construction      | 5'-CGA TTC TGA CGT GCT GCT C – 3'                     | Forward | N/A |
| E2F1 intron 1 cloning from Genomic DNA         | Plasmid Construction      | 5'-TTT CTA GGG CCC CTG CCT AA – 3'                    | Reverse | N/A |
| Adding BglII site to E2F1 intron 1 fragment    | Plasmid Construction      | 5'-GCA GAT CTA TTG ACT GAC TGC CTT GCC TGT -3'        | Forward | N/A |
| Adding BglII site to E2F1 intron 1 fragment    | Plasmid Construction      | 5'-GCA GAT CTT GCA GAG AAG GCC TCC CAA T - 3'         | Reverse | N/A |
| Mutagenesis of PU. 1 binding site              | Site Directed Mutagenesis | 5'- CTG CCA GAG GGA GGA CCT GAG GCC CA – 3'           | Forward | N/A |
| Mutagenesis of PU. 1 binding site              | Site Directed Mutagenesis | 5'- ATG GGC ACG TGA CAA CAC CCA G – 3'                | Reverse | N/A |
| miR-223 447 bp product chrX:96242701+9 6243147 | Plasmid Construction      | 5' - TAG GAT CCC ATG TTA GTG TCT GCC ATT TGT CTC - 3' | Forward | N/A |
| miR-223 447 bp product chrX:96242701+9 6243147 | Plasmid Construction      | 5' - TCG AAT TCC CTG TAT CCC TCA TGT ACC ACT ATG - 3' | Reverse | N/A |
