# Supplementary material
Source: PubMed Central journal article supplement (PMC5477546)
Supplement: MCB.00013-17_zmb999101476s5.pdf [file MCB.00013-17_zmb999101476s5.pdf]

## 1 **Supplemental Bioinformatic Methods**

### 2 *Sequencing of Immunoprecipitated Chromatin*

3 Libraries were generated robotically with 10 ng of fragmented DNA (100-300 bp) using the Kapa  
4 HTP Library Preparation Kit (Kapa Biosystems) as per the manufacturer's recommendations  
5 except that adapters and PCR primers were diluted 100-fold, the size selection step was done after  
6 the PCR step and the number of PCR cycles increased by 6. Adapters and PCR primers were  
7 purchased from Integrated DNA Technologies whereas size selection has been performed on a  
8 Pippin Prep instrument (SAGE Biosciences Inc). Libraries were quantified using the Quant-iT™  
9 PicoGreen® dsDNA Assay Kit (Life Technologies) and the Kapa Illumina GA with Revised  
10 Primers-SYBR Fast Universal kit (D-Mark Biosciences, Toronto ON). Average size fragment was  
11 determined using a LaChip GX (PerkinElmer, Waltham MA) instrument. Libraries were  
12 sequenced on a single-end 100bp read length run on a HiSeq2000 (Illumina).

### 13 *Analysis of ChIP-sequencing*

14 Illumina HiSeq2000 .bam files provided by the Genome Quebec were processed using rmdup  
15 (version 1.0.0) to remove duplicate reads. Files were converted to FASTQ format using Bam-to-  
16 FASTA/Q (version 1.0.0) and reads groomed to remove Illumina adapter sequences with  
17 TrimGalore!(1) in Galaxy Suite (2-4). Single-end reads aligned to reference MGSCv37 (MM9)  
18 using Bowtie (5). Bowtie reported only the best alignment for each fragment (--best) with a  
19 maximum number of 2 mismatches with an average quality score of at least 70. Peaks called in  
20 MACS 1.4.1 with an mfold of (10,30), tag size --100, band width --300, genome size --  
21 1865500000, p-value 1e-05, wiggle resolution --10 (6). Peak-calling was conducted for two  
22 biological replicates for each condition, and replicate region files used for determining differential

23 peaks between the experimental conditions. Peaks significantly differing between non-induced and  
24 two induced samples were determined using the R package DiffBind (7) with a p-value of 0.05  
25 and a fold-change greater than 2. Wiggle files for control and doxycycline-induced were generated  
26 from merged tag data from replicate experiments using MACS1.4.1 as described above. Common  
27 regions between induced and uninduced conditions were determined using Intersect (Galaxy Tool  
28 Version 1.0.0) and reporting the intervals of two datasets that overlapped for at least 100bp.  
29 Location of peaks within the genome were annotated using CEAS (version 1.0.0) (8), span:3000,  
30 profiling resolution:50, Promoter/downstream lower, middle, and upper intervals of 1000, 3000,  
31 and 10000 (respectively). Bi-Promoter lower range: 2500, Bi-Promoter upper range:5000, Relative  
32 distance:3000.

### 33 *Association of differentially-bound regions with gene expression*

34 Regions significantly enriched by ChIP were correlated with gene expression as determined by  
35 Affymetrix Mouse Gene 2.0 ST Microarray (9). Differentially expressed genes were defined as  
36 those with a 1.5-fold change in expression between conditions and P value  $\leq 0.05$  based on  
37 ANOVA using Partek software suite. Peaks increased or new upon induction were correlated to  
38 target genes using GREAT (10), using the Basal plus extension rule with the proximal region was  
39 adjusted to 15kb upstream. Genes were considered differentially regulated by PU.1 if they  
40 demonstrated significant changes by both microarray and upstream binding of PU.1. Genes  
41 differentially expressed and associated with altered PU.1-binding were annotated using DAVID  
42 (11), and top biological processes reported from GOTERM\_BP\_FAT. Interactions between these  
43 differentially expressed genes was visualised using String-DB (*Search Tool for the Retrieval of*  
44 *Interacting Genes/Proteins*) using all gene symbols and organism: mus musculus.

45 *Determination of sequence motifs*

46 Genomic sequences from significantly enriched CHIP regions were extracted using Extract  
47 Genomic DNA (Galaxy Tool Version 2.2.3) using locally cached MM9. FASTA files were sorted  
48 in order of confidence (best to worst). Motifs were identified using Meme-suite (meme-suite.org),  
49 using uniprobe\_mouse input motifs, expecting any number of repetitions and reporting 5 motifs.  
50 Frequency of primary motifs was determined using SPAMO, reporting the number of sequences  
51 containing the primary motif as a percentage of all sequences submitted.

52 *Sequencing of small RNAs*

53 Total RNA was quantified using a NanoDrop Spectrophotometer ND-1000 (NanoDrop  
54 Technologies, Inc.) and its integrity was assessed using a 2100 Bioanalyzer (Agilent  
55 Technologies). Libraries were generated from 1000 ng of total RNA using the TruSeq® Small  
56 RNA Sample Prep Kit (Illumina), as per the manufacturer's recommendations. cDNA construct  
57 purification was performed on a Pippin Prep instrument (SAGE Science, Beverly MA). Final  
58 libraries were quantified using the Quant-iT™ PicoGreen® dsDNA Assay Kit (Life Technologies)  
59 and the Kapa Illumina GA with Revised Primers-SYBR Fast Universal kit (D-Mark Biosciences,  
60 Toronto ON). Average fragment size was determined using a LaChip GX (PerkinElmer, Waltham  
61 MA) instrument. Libraries were multiplexed and sequenced on an Illumina HiSeq 2000 SR50  
62 using the services of Genome Quebec.

63 *Analysis of small RNA sequencing*

64 Illumina TRUSeq RNA sequencing adapters were removed from sequencing reads using  
65 TrimGalore! (1). Trimmed reads were processed and mapped to the mouse genome (MM10) using  
66 MirDeep2 Mapper (V2.0.0) discarding reads less than 15 bp. Collapsed reads were mapped to

67 mirBase Release 21 (12) using MirDeep2 for identification of novel and known microRNAs (13).  
68 Known miRBase mouse microRNAs were quantified using MiRDeep2 quantifier (V2.0.0) and  
69 differential analysis of fold change was conducted using DESeq2 (14). Differentially expressed  
70 microRNAs were considered significant if they had a log-fold change greater than 1 and a p-value  
71 <0.05.

## 72 *Analysis of predicted miRNA targets*

73 Significantly over-expressed miRNAs determined using DeSeq were analysed for predicted and  
74 validated targets using MirGate (15). MirGate database was queried using MirBase miRNA  
75 identifiers against Organism: mouse. Targets were considered validated if they had a least 1  
76 confirmed prediction. Computational Predictions of 3' UTRs were determined using TargetScan  
77 and Miranda.

78

- 79 1. **Krueger F.** 2015. Trim Galore!
- 80 2. **Blankenberg D, Von Kuster G, Coraor N, Ananda G, Lazarus R, Mangan M, Nekrutenko A, Taylor**  
81 **J.** 2010. Galaxy: a web-based genome analysis tool for experimentalists. Curr Protoc Mol Biol  
82 **Chapter 19:**Unit 19 10 11-21.
- 83 3. **Giardine B, Riemer C, Hardison RC, Burhans R, Elnitski L, Shah P, Zhang Y, Blankenberg D, Albert**  
84 **I, Taylor J, Miller W, Kent WJ, Nekrutenko A.** 2005. Galaxy: a platform for interactive large-scale  
85 genome analysis. Genome Res **15:**1451-1455.
- 86 4. **Goecks J, Nekrutenko A, Taylor J.** 2010. Galaxy: a comprehensive approach for supporting  
87 accessible, reproducible, and transparent computational research in the life sciences. Genome  
88 Biol **11:**R86.

- 89 5. **Langmead B, Trapnell C, Pop M, Salzberg SL.** 2009. Ultrafast and memory-efficient alignment of  
90 short DNA sequences to the human genome. *Genome Biol* **10**:R25.
- 91 6. **Zhang Y, Liu T, Meyer CA, Eeckhoute J, Johnson DS, Bernstein BE, Nusbaum C, Myers RM, Brown  
92 M, Li W, Liu XS.** 2008. Model-based analysis of ChIP-Seq (MACS). *Genome Biol* **9**:R137.
- 93 7. **Stark R, Brown G.** 2011. DiffBind: differential binding analysis of ChIP-Seq peak data.  
94 <http://bioconductor.org/packages/release/bioc/vignettes/DiffBind/inst/doc/DiffBindpdf>.
- 95 8. **Shin H, Liu T, Manrai AK, Liu XS.** 2009. CEAS: cis-regulatory element annotation system.  
96 *Bioinformatics* **25**:2605-2606.
- 97 9. **Ziliotto R, Gruca MR, Podder S, Noel G, Ogle CK, Hess DA, DeKoter RP.** 2014. PU.1 promotes cell  
98 cycle exit in the murine myeloid lineage associated with downregulation of E2F1. *Experimental  
99 Hematology* **42**:204-217.e201.
- 100 10. **McLean CY, Bristor D, Hiller M, Clarke SL, Schaar BT, Lowe CB, Wenger AM, Bejerano G.** 2010.  
101 GREAT improves functional interpretation of cis-regulatory regions. *Nat Biotechnol* **28**:495-501.
- 102 11. **Huang da W, Sherman BT, Lempicki RA.** 2009. Systematic and integrative analysis of large gene  
103 lists using DAVID bioinformatics resources. *Nat Protoc* **4**:44-57.
- 104 12. **Kozomara A, Griffiths-Jones S.** 2014. miRBase: annotating high confidence microRNAs using deep  
105 sequencing data. *Nucleic Acids Res* **42**:D68-73.
- 106 13. **Friedlander MR, Chen W, Adamidi C, Maaskola J, Einspanier R, Knepel S, Rajewsky N.** 2008.  
107 Discovering microRNAs from deep sequencing data using miRDeep. *Nat Biotechnol* **26**:407-415.
- 108 14. **Love MI, Huber W, Anders S.** 2014. Moderated estimation of fold change and dispersion for RNA-  
109 seq data with DESeq2. *Genome Biol* **15**:550.
- 110 15. **Andrés-León E, González Peña D, Gómez-López G, Pisano DG.** 2015. miRGate: a curated database  
111 of human, mouse and rat miRNA–mRNA targets. *Database: The Journal of Biological Databases  
112 and Curation* **2015**:bav035.
